# Supplementary material for: Rapid selection of aptamers based on protein microarray
Source: Royal Society of Chemistry journal article supplement (doi:10.1039/c8ra09232j), 2019-01-01

## Electronic Supplementary Material

### Rapid selection of aptamers based on Protein Microarray

Fang Yu <sup>a</sup>, Hui Li<sup>\*a</sup>, Wei Sun<sup>b</sup>, Danke Xu<sup>\*a</sup>, Fuchu He<sup>\*a,b</sup>

<sup>a</sup> *State Key Laboratory of Analytical Chemistry for Life Science, School of Chemistry and Chemical Engineering, Nanjing University, Nanjing, Jiangsu 210046, China*

<sup>b</sup> *State Key Laboratory of Proteomics, National Center for Protein Sciences Beijing, Beijing Institute of Radiation Medicine, Beijing 102206, China*

#### Contents

Fig. S1 The fluorescence images of enriched aptamers on negative microarrays in every round of the first selection.

Table S1 The selected aptamers candidates for the first circle selection of Lac.

Fig. S2 The fluorescence images of enriched aptamers on negative microarrays in every round of the second selection.

Table S2 The selected aptamers candidates for the second circle selection of Lac.

Fig. S1 The fluorescence images of enriched aptamers on negative microarrays in every round of the first selection.

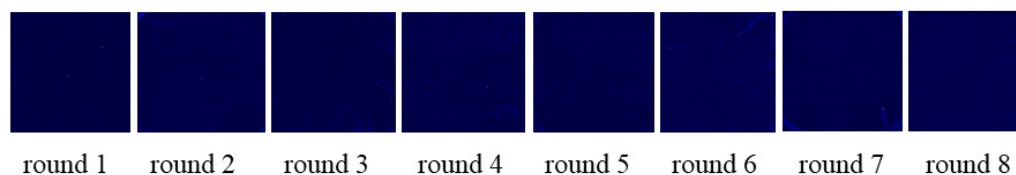

Table S1 The selected aptamers candidates for the first circle selection of Lac.

| Aptamer-ID | Sequences of N40 from 5' to 3'               | $\Delta G$<br>(kcal mol <sup>-1</sup> ) | The sixth round | Truncated sequences of library from 5' to 3'                                        | $\Delta G$<br>(kcal mol <sup>-1</sup> ) |
|------------|----------------------------------------------|-----------------------------------------|-----------------|-------------------------------------------------------------------------------------|-----------------------------------------|
| YFL-1      | CGGTGCATCTATGGCTACTAG<br>CTTTCTGCCTATACTAC   | -2.27                                   | 2               | AGGCAGGACACCGTAACCGGTGCATCTATGGCTACTAGCT<br>TTTCTGCCT                               | -11.92                                  |
| YFL-2      | AATACTCCTGTTACCGTGCAT<br>CTATGGCCATTGGCTTTTC | -2.26                                   | 2               | GGCAGGACACCGTAACAATACTCCTGTTACCGTGCATCTAT<br>GGCCATTGGCTTTTCTGCT                    | -9.35                                   |
| YFL-3      | CCTAACACGTACGGGGCATT<br>ATGGCATAGCTCTTCTCC   | -0.77                                   | 6               | GGCAGGACACCGTAACCTAACACGTACGGGGCATTATG<br>GCATAGCTCTTCTCCCTGCT                      | -7.16                                   |
| YFL-4      | ACGGGCTGATGCTCTCTTTAT<br>TTTACCTAAATAAAGTGTC | -7.06                                   | 7               | GCAGGACACCGTAACACGGGCTGATGCTCTCTTTATTTTAC<br>CTAAATAAAGTGTCTGCTG                    | -14.3                                   |
| YFL-5      | CGGGCATTGCTCTCAATTTA<br>GTCTCAAATGTGGCCTGC   | -5.01                                   | 2               | CAGGCAGGACACCGTAACCGGGCATTGCTCTCAATTTAG<br>TCTCAAATGTGGCCTGCCTG                     | -14.04                                  |
| YFL-6      | CGGTGCATCTATGGCTACTAG<br>CTTCTGCCTATACTAC    | -2.27                                   | 18              | AGGCAGGACACCGTAACCGGTGCATCTATGGCTACTAGCT<br>CTTCTGCCT                               | -11.21                                  |
| YFL-7      | GGGTGCACACTCTTATTTTTA<br>CACGAGCCAAAAATATGTC | -3.53                                   | 3               | GCAGGACACCGTAACGGGTGCACACTCTTATTTTTACACG<br>AGCCAAAAATATGTCTGCTG                    | -9.51                                   |
| YFL-8      | TCATCCCAAGTCCGGTGCCA<br>TCTATGGGCTTCGCTTTTC  | -2.47                                   | 3               | GGCAGGACACCGTAACTCATCCCAAGTCCGGTGCCATCT<br>ATGGGCTTCGCTTTTCTGCT                     | -8.19                                   |
| YFL-9      | CCCTAGTTCCTGGTGCATTTAT<br>GGCAAAGCTTTTCTGCC  | -2.75                                   | 3               | AGGCAGGACACCGTAAACCCTAGTTCCTGGTGCATTTATG<br>GCAAAGCTTTTCTGCC                        | -9.26                                   |
| YFL-10     | ACTGCTTTATCCCCGTCGGCTT<br>GGCTCTTCGACAGTGTGG | -3.33                                   | 4               | GCAGGACACCGTAAACTGCTTTATCCCCGTCGGCTTGGCT<br>CTTCGACAGTGTGGCTGCTACC                  | -6.06                                   |
| YFL-11     | ACTGCTTTATCCCCGTCGGCTT<br>GGCTCTTCGACAGTGTGG | -3.33                                   | 2               | GGCAGGACACCGTAAACTGCTTTATCCCCGTCGGCTTGGC<br>TCTTCGACAGTGTGGCTGCT                    | -5.83                                   |
| YFL-12     | ATTGAGCAGACGGGAGACCT<br>TTAGAGTTGTAAGTTGAGT  | -2.85                                   | 4               | GAGCAGACGGGAGACCTTTAGAGTTGTAAGTTGAGTCTGC<br>TA                                      | -7.12                                   |
| YFL-13     | GGTGCATCCATGGCTTTTAGC<br>TCTTCTGAACTGTACAC   | -2.68                                   | 2               | GACAGGACAGGACACCGTAAACCGGTGCATCCATGGCTTTAG<br>CTTCTTCTGAACTGTACA                    | -10.7                                   |
| YFL-14     | GGTGCATCTATGGCTTTGCTC<br>TTCTACCTGTTCTACGAG  | -1.61                                   | 2               | GACAGGACAGGACACCGTAAACCGGTGCATCTATGGCTTTGCT<br>CTTCTACCTGTTCTACGAGCTGCTACCTCCCTCTCT | -8.58                                   |
| YFL-15     | GACCGGTTCTCGTAGGTGCGC<br>GTATGCGGCTATGCTTTTC | -4.83                                   | 2               | GGCAGGACACCGTAAACGACCGGTTCTCGTAGGTGCGCGTA<br>TGCGGCTATGCTTTTCTGCT                   | -10.1                                   |
| YFL-16     | GGTGCCTGTACACGGCTTTGC<br>TTTTCTGCCTCTGTTTAC  | -4.19                                   | 2               | CAGGCAGGACACCGTAAACGGTGCCTGTACACGGCTTTGCT<br>TTTTCTGCCTC                            | -11.76                                  |

Fig. S2 The fluorescence images of enriched aptamers on negative microarrays in every round of the second selection.

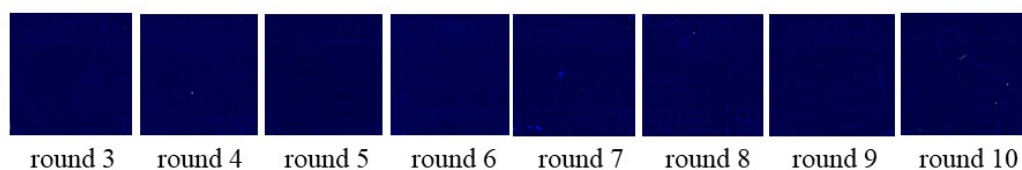

Table S2 The selected aptamers candidates for the second circle selection of Lac.

| Aptamer-ID | Sequences of N40 from 5' to 3'                   | $\Delta G$<br>(kcal mol <sup>-1</sup> ) | Truncated sequences of library from 5' to 3'                                         | $\Delta G$<br>(kcal mol <sup>-1</sup> ) | Repeat times    |                   |                  |
|------------|--------------------------------------------------|-----------------------------------------|--------------------------------------------------------------------------------------|-----------------------------------------|-----------------|-------------------|------------------|
|            |                                                  |                                         |                                                                                      |                                         | The sixth round | The seventh round | The eighth round |
| YFL-1      | CGGTGCATCTATGGCTACTA<br>GCTTTTCCTGCCTATACTAC     | -2.27                                   | AGGCAGGACACCGTAACCGGTGCATCTATGGC<br>TACTAGCTTTTCCTGCCT                               | -11.92                                  | 2               | 1                 | 2                |
| YFL-4      | ACGGGCTGATGCTCTCTTTA<br>TTTACCTAAATAAAGTGTC      | -7.06                                   | GCAGGACACCGTAACACGGGCTGATGCTCTCT<br>TTATTTTACCTAAATAAAGTGCTCTGC                      | -14.3                                   | 2               | 1                 | 7                |
| YFL-5      | CGGGCATTGCTCTCAATTT<br>AGTCTCAAATGTGGCCTGC       | -5.01                                   | CAGGCAGGACACCGTAACCGGGCATTGCTCT<br>CAATTTAGTCTCAAATGTGGCCTGCCTG                      | -14.04                                  | 1               | 1                 | 2                |
| YFL-6      | CGGTGCATCTATGGCTACTA<br>GCTCTTCCTGCCTATACTAC     | -2.27                                   | AGGCAGGACACCGTAACCGGTGCATCTATGGC<br>TACTAGCTCTTCCTGCCT                               | -11.21                                  | 0               | 4                 | 4                |
| YFL-17     | GGGCTATGCTCTAAATCTT<br>CCTACTGACGCAATTTGGGA      | -1.17                                   | CCGTAACGGGCTATGCTCTAAATCTTCCTACT<br>GACGCAATTTGGACTGCTACCTCCCTCC                     | -2.66                                   | 2               | 2                 | 1                |
| YFL-7      | GGGTGCACACTCTTATTTTT<br>ACACGAGCCAAAAATATGT<br>C | -3.53                                   | GCAGGACACCGTAACGGGTGCACACTCTTATT<br>TTTACACGAGCCAAAAATATGCTCTGC                      | -9.51                                   | 2               | 2                 | 4                |
| YFL-10     | ACTGCTTTATCCCCGTCGGC<br>TTGGCTCTTCGACAGTGTTG     | -3.33                                   | GCAGGACACCGTAACACTGCTTTATCCCCGTC<br>GGCTTGGCTCTTCGACAGTGTTGGCTGCTACC                 | -6.06                                   | 11              | 5                 | 17               |
| YFL-18     | AACAACCTCGTATCCGGTGC<br>ATTTATGGCGAATGCTTTTC     | -4.71                                   | GCAGGACACCGTAACAACAACCTCGTATCCGG<br>TGCATTTATGGCGAATGCTTTTCCTGC                      | -7.96                                   | 1               | 3                 | 3                |
| YFL-11     | ACTGCTTTATCCCCGTCGGC<br>TTGGCTCTTCGACAGTGTTG     | -3.33                                   | GCAGGACACCGTAACACTGCTTTATCCCCGTC<br>GGCTTGGCTCTTCGAC                                 | -5.12                                   | 4               | 3                 | 10               |
| YFL-19     | ACTGCTTTATCCCCGTCGGC<br>TTGTCTCTTCGACAGTGTTG     | -3.33                                   | GCAGGACACCGTAACACTGCTTTATCCCCGTC<br>GGCTTGTCTCTTCGACAGTGTTGGCTGCTACC                 | -6.06                                   | 17              | 23                | 43               |
| YFL-14     | GGTGCATCTATGGCTTTGCT<br>CTTCTACCTGTTCTACGAG      | -1.61                                   | ACAGGCAGGACACCGTAACGGTGCATCTATGG<br>CTTTGCTCTTCCTACCTGTTCTACGAGCTGCTA<br>CCTCCCTCCTC | -8.14                                   | 11              | 10                | 7                |
| YFL-20     | ACTGCTTTATCCCCGTCGGC<br>TTGTCTCTTCGACAGTGTTG     | -3.33                                   | GCAGGACACCGTAACACTGCTTTATCCCCGTC<br>GGCTTGTCTCTTCGAC                                 | -5.21                                   | 5               | 5                 | 12               |
| YFL-21     | GGGCGCACGCTCTGAATTTT<br>TCATATGAAACAATTCTGTC     | -5.97                                   | GCAGGACACCGTAACGGGCGCACGCTCTGAAT<br>TTTTCATATGAAACAATTCTGCTCTGC                      | -11.61                                  | 2               | 4                 | 8                |
| YFL-22     | TCGCATCGGTGCATCTATGG<br>CGCACGCTCTTCCTGCCTTC     | -4.81                                   | AGGCAGGACACCGTAACCTCGCATCGGTGCATC<br>TATGGCGCACGCTCTTCCTGCCT                         | -10.71                                  | 1               | 0                 | 3                |

|        |                                                 |       |                                                                   |        |   |   |   |
|--------|-------------------------------------------------|-------|-------------------------------------------------------------------|--------|---|---|---|
| YFL-23 | TTCCGGATAATCAGACGATA<br>TATGAGGAATTCTGAGGGTA    | -2.05 | CCGTAACTTCCGGATAATCAGACGATATATGA<br>GGAATTCTGAGGGTACTGCTACCTCCCTC | -6.44  | 1 | 1 | 2 |
| YFL-24 | CTTTCAGGGTGGTGCCGTTT<br>CGGGCTTTGTCTCTTCTGTC    | -2.75 | CAGGCAGGACACCGTAACCTTTCAGGGTGGTG<br>CCGTTTCGGGCTTTGTCTCTTCTGCTG   | -11.37 | 0 | 1 | 2 |
| YFL-25 | ACTGCTTTATCCCCGTCGGC<br>TTGCTCTTCGACAGTGTG      | -3.33 | GCAGGACACCGTAACACTGCTTTATCCCCGTC<br>GGCTTTGCTCTTCGAC              | -5.12  | 1 | 1 | 1 |
| YFL-26 | CGGGCTTTAGCTCTAAAAAA<br>TGTCACCATCTTTTTTGTCTGTC | -4.37 | GCAGGACACCGTAACCGGGCTTTAGCTCTAAA<br>AAATGTCCACCATCTTTTTTGTCTGTC   | -10.7  | 0 | 1 | 2 |

Fig. S3 The secondary structures of six selected aptamers were simulated with OligoAnalyzer 3.1 at the minimum  $\Delta G$ . (a) YFL-13, (b) YFL-16, (c) YFL-21, (d) YFL-22, (e) YFL-24, (f) YFL-26.

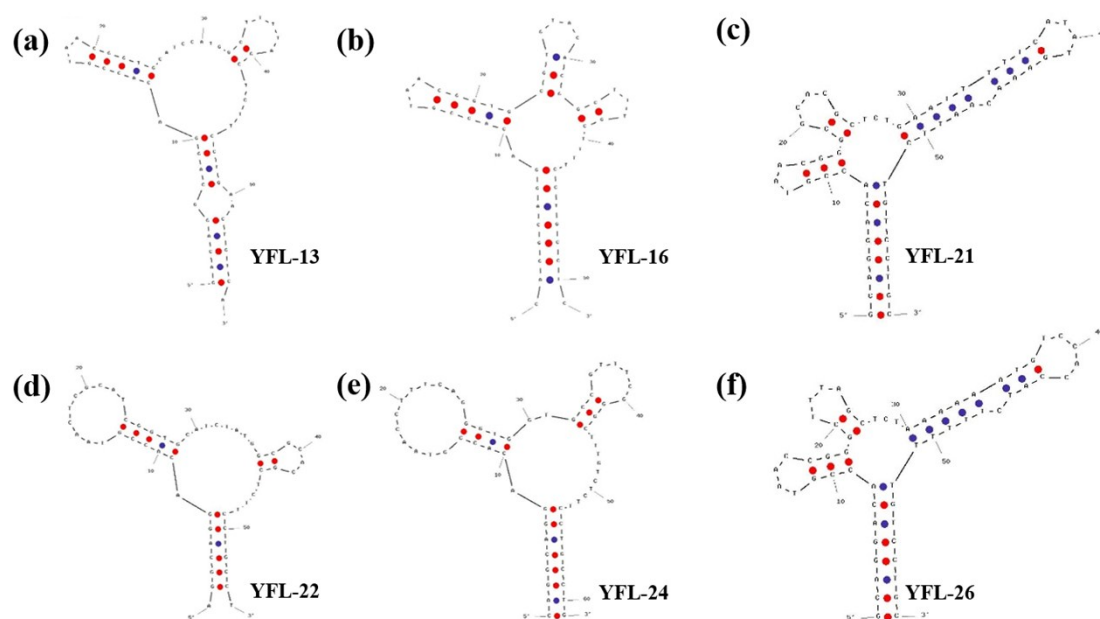

Supplement: c8ra09232j1.pdf [file c8ra09232j1.pdf]
